# Supplementary material
Source: PubMed Central journal article supplement (PMC3290715)

# Supplementary Figure 1, S. J. Elledge

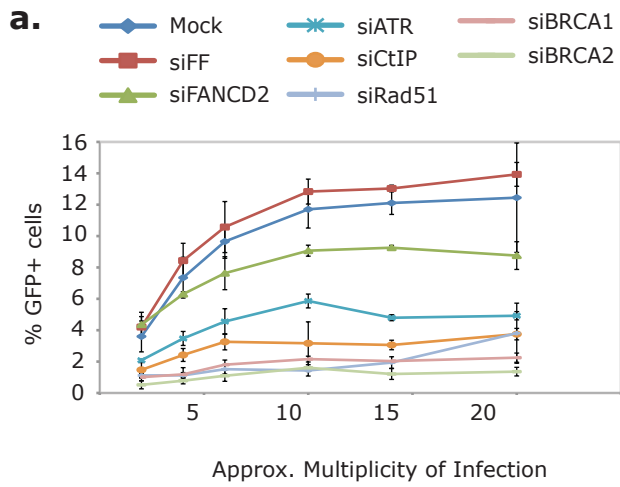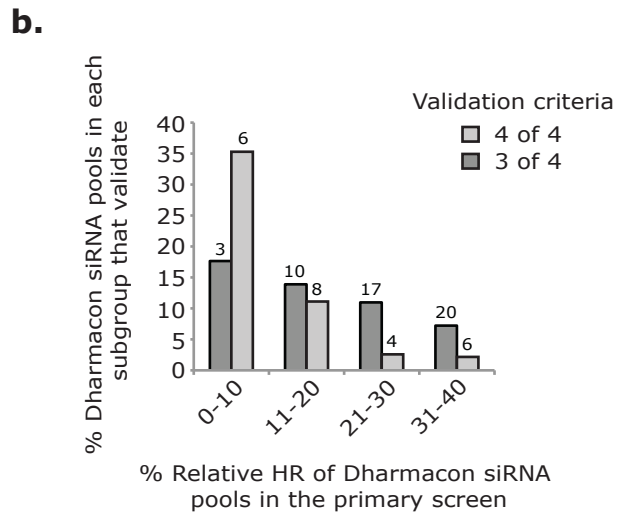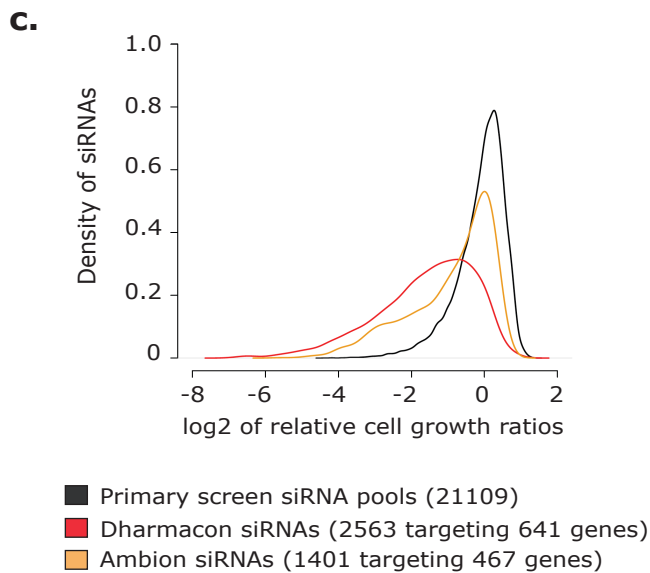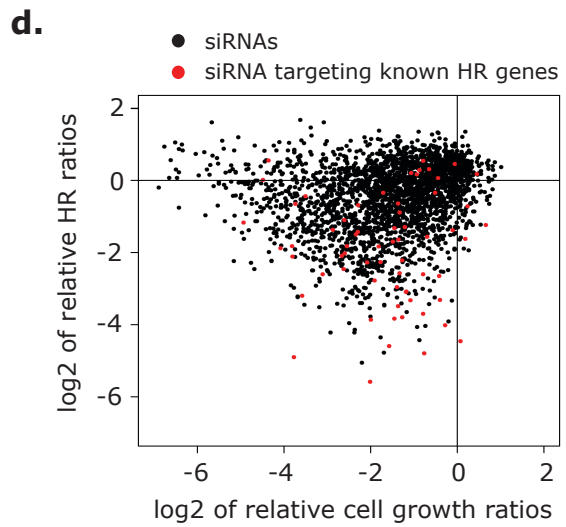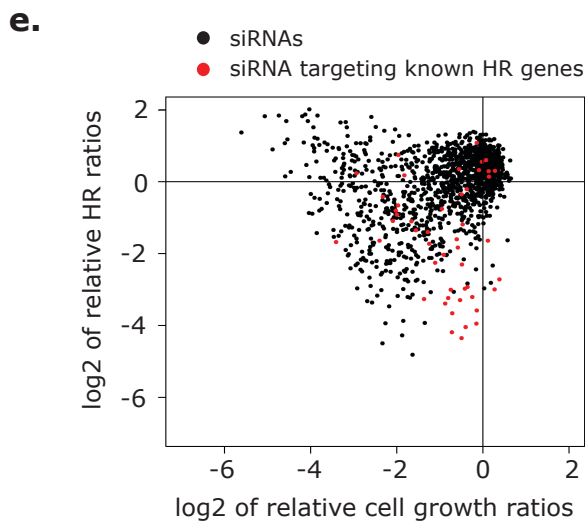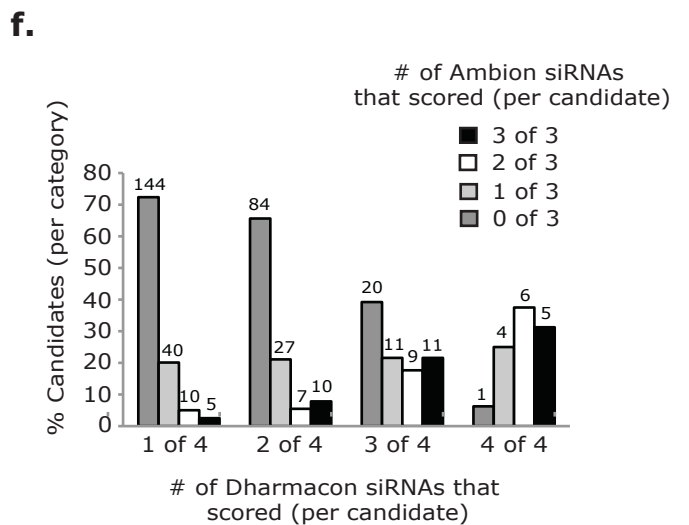

Supplement: NIHMS346925-supplement-2.pdf [file NIHMS346925-supplement-2.pdf]
