# Supplementary material
Source: PubMed Central journal article supplement (PMC3290715)

# Dharmacon vs. Ambion Cherrypicks

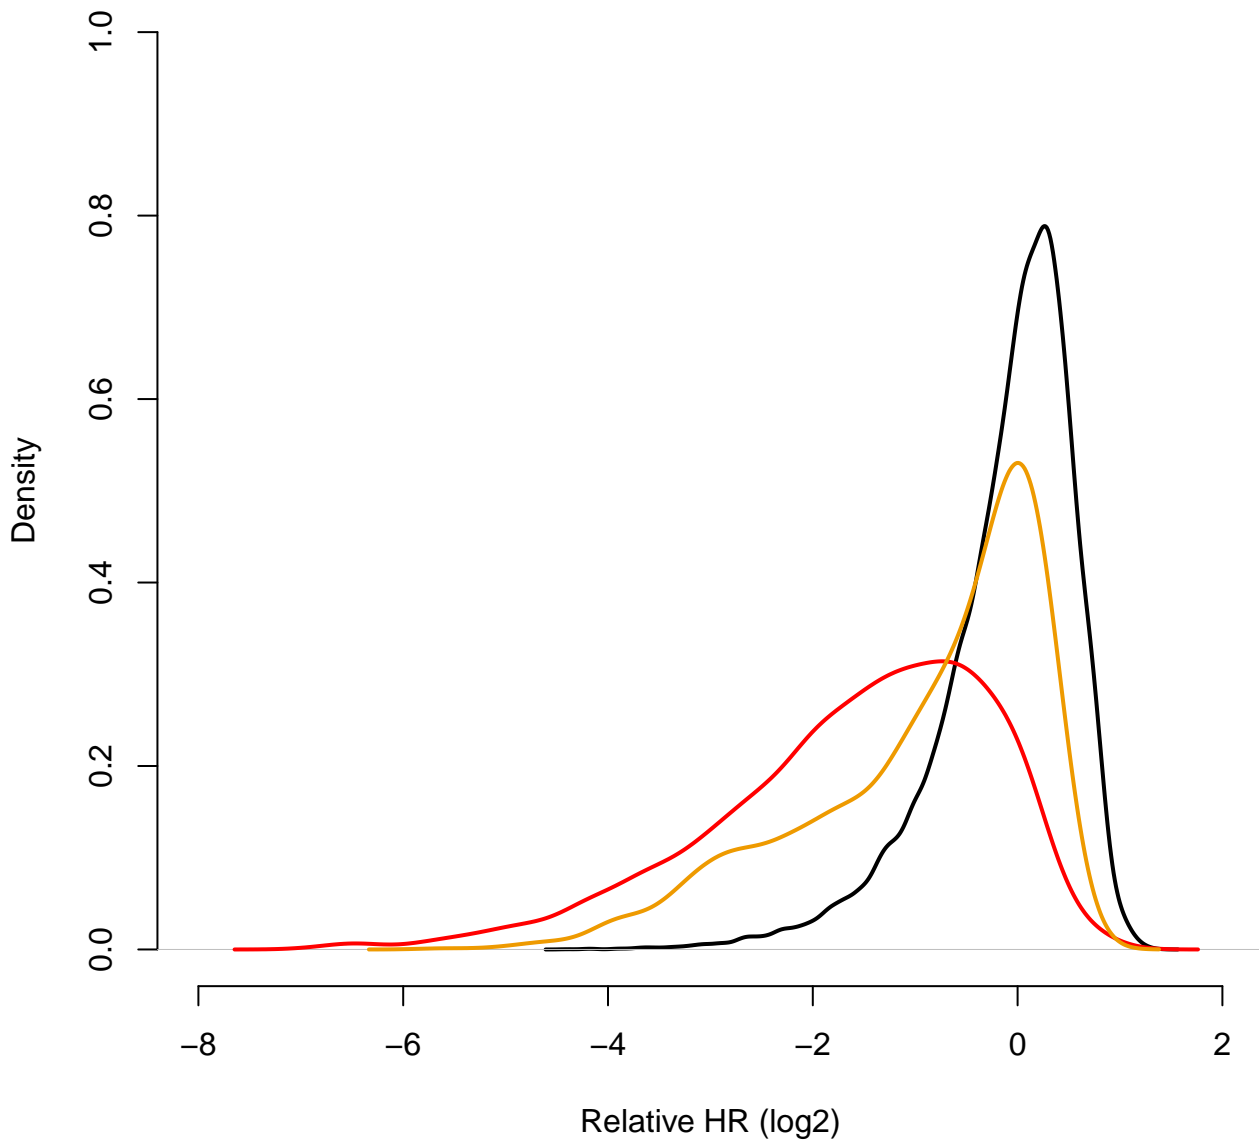

Supplement: NIHMS346925-supplement-3.pdf [file NIHMS346925-supplement-3.pdf]
