# Supplementary material
Source: PubMed Central journal article supplement (PMC3290715)

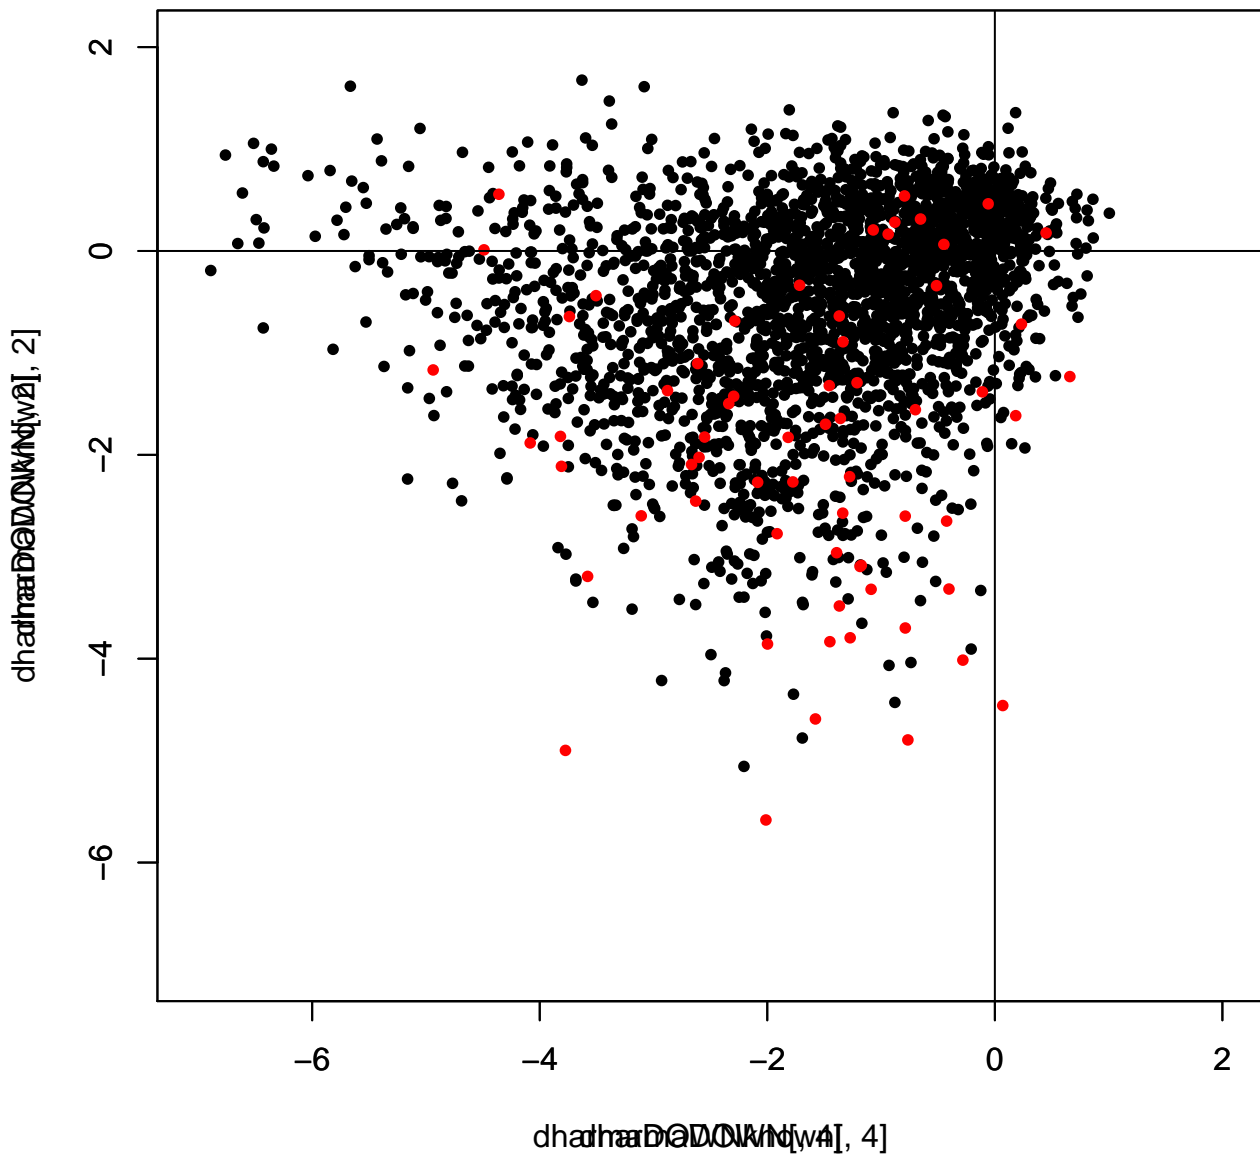

Supplement: NIHMS346925-supplement-4.pdf [file NIHMS346925-supplement-4.pdf]
